# Supplementary material for: HDL-Related Parameters and COVID-19 Mortality: The Importance of HDL Function
Source: MDPI journal article supplement (doi:10.3390/antiox12112009), 2023-11-16
Supplement: s1 [file s1]

| parameter    |      |                                       |        | data of this study cohort (all samples) |     |                   |                  |                    |      | COVID-19 patients |                   |                  |                    |      | Non-COVID pneumonia controls |                   |                  |                    |  |
|--------------|------|---------------------------------------|--------|-----------------------------------------|-----|-------------------|------------------|--------------------|------|-------------------|-------------------|------------------|--------------------|------|------------------------------|-------------------|------------------|--------------------|--|
| Lipoproteins |      |                                       |        |                                         |     |                   |                  |                    |      |                   |                   |                  |                    |      |                              |                   |                  |                    |  |
| abbreviation |      | full name                             | unit   | mean                                    | sd  | Q <sub>2.5%</sub> | Q <sub>50%</sub> | Q <sub>97.5%</sub> | mean | sd                | Q <sub>2.5%</sub> | Q <sub>50%</sub> | Q <sub>97.5%</sub> | mean | sd                           | Q <sub>2.5%</sub> | Q <sub>50%</sub> | Q <sub>97.5%</sub> |  |
| 1            | TPTG | total triglycerides                   | mg/dL  | 143                                     | 79  | 46                | 120              | 347                | 122  | 55                | 43                | 119              | 238                | 157  | 89                           | 57                | 124              | 345                |  |
| 2            | TPCH | total cholesterol                     | mg/dL  | 180                                     | 58  | 79                | 177              | 299                | 201  | 55                | 104               | 207              | 298                | 166  | 56                           | 79                | 161              | 290                |  |
| 3            | LDCH | LDL cholesterol                       | mg/dL  | 93                                      | 43  | 19                | 89               | 185                | 105  | 45                | 28                | 112              | 179                | 84   | 41                           | 28                | 83               | 170                |  |
| 4            | HDCH | HDL cholesterol                       | mg/dL  | 44                                      | 17  | 18                | 41               | 82                 | 51   | 18                | 23                | 52               | 82                 | 39   | 14                           | 20                | 37               | 78                 |  |
| 5            | TPA1 | total Apo-A1                          | mg/dL  | 123                                     | 37  | 60                | 117              | 215                | 140  | 39                | 73                | 143              | 216                | 111  | 31                           | 61                | 110              | 184                |  |
| 6            | TPA2 | total Apo-A2                          | mg/dL  | 26                                      | 8   | 12                | 25               | 44                 | 28   | 8                 | 12                | 28               | 44                 | 24   | 7                            | 13                | 23               | 37                 |  |
| 7            | TPAB | total Apo-B100                        | mg/dL  | 97                                      | 32  | 41                | 97               | 173                | 96   | 29                | 50                | 100              | 162                | 97   | 34                           | 41                | 96               | 157                |  |
| 8            | LDHD | LDL-cholesterol/HDL-cholesterol ratio | -/-    | 2,2                                     | 1,0 | 0,6               | 2,1              | 4,3                | 2,1  | 0,9               | 0,6               | 2,1              | 3,9                | 2,3  | 1,1                          | 0,7               | 2,1              | 4,2                |  |
| 9            | ABA1 | Apo-B100/Apo-A1 ratio                 | -/-    | 0,8                                     | 0,3 | 0,3               | 0,8              | 1,6                | 0,7  | 0,3               | 0,3               | 0,7              | 1,4                | 0,9  | 0,4                          | 0,4               | 0,9              | 1,6                |  |
| 10           | TBPN | total particle number                 | nmol/L | 1760                                    | 586 | 737               | 1768             | 3143               | 1753 | 532               | 902               | 1816             | 2945               | 1766 | 625                          | 748               | 1750             | 2861               |  |
| 11           | VLPN | VLDL particle number                  | nmol/L | 209                                     | 117 | 32                | 174              | 471                | 169  | 89                | 30                | 145              | 363                | 235  | 127                          | 89                | 178              | 461                |  |
| 12           | IDPN | IDL particle number                   | nmol/L | 155                                     | 78  | 45                | 138              | 332                | 140  | 64                | 58                | 126              | 274                | 166  | 86                           | 46                | 142              | 286                |  |
| 13           | LDPN | LDL particle number                   | nmol/L | 1371                                    | 492 | 541               | 1417             | 2397               | 1402 | 480               | 565               | 1462             | 2413               | 1351 | 504                          | 549               | 1416             | 2292               |  |
| 14           | L1PN | LDL-1 particle number                 | nmol/L | 265                                     | 120 | 89                | 243              | 515                | 271  | 127               | 109               | 239              | 559                | 260  | 117                          | 90                | 260              | 474                |  |
| 15           | L2PN | LDL-2 particle number                 | nmol/L | 141                                     | 86  | 0                 | 135              | 342                | 151  | 93                | 38                | 144              | 347                | 134  | 82                           | 1                 | 125              | 296                |  |
| 16           | L3PN | LDL-3 particle number                 | nmol/L | 194                                     | 82  | 69                | 189              | 367                | 206  | 88                | 69                | 207              | 363                | 187  | 79                           | 70                | 177              | 348                |  |
| 17           | L4PN | LDL-4 particle number                 | nmol/L | 188                                     | 115 | 0                 | 164              | 458                | 198  | 99                | 0                 | 193              | 363                | 181  | 124                          | 2                 | 160              | 448                |  |
| 18           | L5PN | LDL-5 particle number                 | nmol/L | 231                                     | 143 | 0                 | 230              | 572                | 237  | 144               | 0                 | 249              | 499                | 227  | 144                          | 1                 | 228              | 524                |  |
| 19           | L6PN | LDL-6 particle number                 | nmol/L | 332                                     | 182 | 0                 | 298              | 777                | 337  | 194               | 69                | 323              | 729                | 329  | 175                          | 60                | 298              | 685                |  |
| 20           | VLTG | VLDL triglycerides                    | mg/dL  | 87                                      | 55  | 17                | 75               | 242                | 71   | 35                | 24                | 66               | 142                | 98   | 63                           | 23                | 78               | 240                |  |
| 21           | IDTG | IDL triglycerides                     | mg/dL  | 11                                      | 11  | 0                 | 7                | 43                 | 8    | 7                 | 0                 | 7                | 24                 | 12   | 12                           | 0                 | 8                | 41                 |  |
| 22           | LDTG | LDL triglycerides                     | mg/dL  | 36                                      | 15  | 16                | 34               | 69                 | 31   | 12                | 17                | 29               | 56                 | 39   | 17                           | 16                | 37               | 67                 |  |
| 23           | HDTG | HDL triglycerides                     | mg/dL  | 16                                      | 6   | 6                 | 14               | 34                 | 15   | 6                 | 6                 | 14               | 26                 | 16   | 7                            | 8                 | 15               | 34                 |  |
| 24           | VLCH | VLDL cholesterol                      | mg/dL  | 24                                      | 15  | 4                 | 21               | 70                 | 22   | 14                | 3                 | 21               | 55                 | 25   | 16                           | 7                 | 20               | 67                 |  |
| 25           | IDCH | IDL cholesterol                       | mg/dL  | 20                                      | 11  | 1                 | 19               | 44                 | 19   | 9                 | 5                 | 19               | 38                 | 20   | 12                           | 1                 | 18               | 43                 |  |
| 26           | VLFC | VLDL free cholesterol                 | mg/dL  | 10                                      | 6   | 2                 | 9                | 26                 | 9    | 5                 | 2                 | 9                | 20                 | 11   | 6                            | 4                 | 9                | 26                 |  |
| 27           | IDFC | IDL free cholesterol                  | mg/dL  | 5                                       | 3   | 0                 | 5                | 13                 | 5    | 3                 | 1                 | 5                | 11                 | 6    | 4                            | 0                 | 5                | 13                 |  |
| 28           | LDFC | LDL free cholesterol                  | mg/dL  | 33                                      | 12  | 12                | 32               | 57                 | 36   | 13                | 13                | 37               | 57                 | 31   | 12                           | 12                | 30               | 53                 |  |
| 29           | HDFC | HDL free cholesterol                  | mg/dL  | 12                                      | 6   | 2                 | 11               | 25                 | 15   | 6                 | 3                 | 15               | 26                 | 11   | 5                            | 2                 | 10               | 22                 |  |
| 30           | VLPL | VLDL phospholipids                    | mg/dL  | 19                                      | 11  | 5                 | 17               | 47                 | 17   | 9                 | 5                 | 18               | 35                 | 21   | 12                           | 8                 | 16               | 47                 |  |
| 31           | IDPL | IDL phospholipids                     | mg/dL  | 6                                       | 4   | 0                 | 6                | 17                 | 6    | 3                 | 1                 | 6                | 13                 | 6    | 5                            | 0                 | 6                | 17                 |  |
| 32           | LDPL | LDL phospholipids                     | mg/dL  | 58                                      | 21  | 23                | 59               | 104                | 63   | 21                | 25                | 62               | 101                | 55   | 20                           | 26                | 56               | 99                 |  |
| 33           | HDPL | HDL phospholipids                     | mg/dL  | 67                                      | 21  | 37                | 63               | 124                | 76   | 24                | 40                | 72               | 125                | 60   | 16                           | 37                | 60               | 103                |  |
| 34           | HDA1 | HDL Apo-A1                            | mg/dL  | 115                                     | 39  | 55                | 111              | 213                | 133  | 42                | 61                | 137              | 214                | 104  | 32                           | 55                | 104              | 183                |  |
| 35           | HDA2 | HDL Apo-A2                            | mg/dL  | 27                                      | 7   | 13                | 27               | 44                 | 29   | 8                 | 13                | 29               | 43                 | 26   | 7                            | 16                | 25               | 37                 |  |
| 36           | VLAB | VLDL Apo-B100                         | mg/dL  | 11                                      | 6   | 2                 | 10               | 26                 | 9    | 5                 | 2                 | 8                | 20                 | 13   | 7                            | 5                 | 10               | 25                 |  |
| 37           | IDAB | IDL Apo-B100                          | mg/dL  | 9                                       | 4   | 2                 | 8                | 18                 | 8    | 3                 | 3                 | 7                | 15                 | 9    | 5                            | 3                 | 8                | 16                 |  |
| 38           | LDAB | LDL Apo-B100                          | mg/dL  | 75                                      | 27  | 30                | 78               | 132                | 77   | 26                | 31                | 80               | 133                | 74   | 28                           | 30                | 78               | 126                |  |
| 39           | V1TG | VLDL-1 triglycerides                  | mg/dL  | 44                                      | 37  | 4                 | 33               | 151                | 33   | 25                | 4                 | 24               | 90                 | 51   | 42                           | 6                 | 39               | 150                |  |
| 40           | V2TG | VLDL-2 triglycerides                  | mg/dL  | 11                                      | 7   | 2                 | 9                | 34                 | 9    | 5                 | 3                 | 9                | 19                 | 12   | 8                            | 3                 | 10               | 33                 |  |
| 41           | V3TG | VLDL-3 triglycerides                  | mg/dL  | 13                                      | 8   | 3                 | 11               | 32                 | 11   | 6                 | 3                 | 10               | 22                 | 14   | 9                            | 3                 | 12               | 31                 |  |
| 42           | V4TG | VLDL-4 triglycerides                  | mg/dL  | 13                                      | 8   | 3                 | 11               | 29                 | 11   | 6                 | 3                 | 11               | 25                 | 14   | 9                            | 5                 | 11               | 28                 |  |
| 43           | V5TG | VLDL-5 triglycerides                  | mg/dL  | 4                                       | 2   | 1                 | 4                | 8                  | 3    | 1                 | 1                 | 4                | 6                  | 4    | 2                            | 2                 | 4                | 8                  |  |
| 44           | V1CH | VLDL-1 cholesteryl                    | mg/dL  | 6                                       | 6   | 0                 | 5                | 22                 | 6    | 6                 | 0                 | 5                | 20                 | 7    | 7                            | 1                 | 4                | 22                 |  |
| 45           | V2CH | VLDL-2 cholesteryl                    | mg/dL  | 3                                       | 2   | 0                 | 2                | 10                 | 3    | 2                 | 0                 | 2                | 8                  | 3    | 2                            | 0                 | 2                | 9                  |  |
| 46           | V3CH | VLDL-3 cholesteryl                    | mg/dL  | 4                                       | 3   | 0                 | 4                | 13                 | 4    | 3                 | 1                 | 4                | 11                 | 4    | 3                            | 1                 | 4                | 12                 |  |
| 47           | V4CH | VLDL-4 cholesteryl                    | mg/dL  | 8                                       | 4   | 1                 | 7                | 17                 | 7    | 4                 | 2                 | 7                | 16                 | 8    | 5                            | 2                 | 7                | 16                 |  |
| 48           | V5CH | VLDL-5 cholesteryl                    | mg/dL  | 2                                       | 1   | 0                 | 1                | 4                  | 1    | 1                 | 0                 | 1                | 4                  | 2    | 1                            | 0                 | 1                | 4                  |  |
| 49           | V1FC | VLDL-1 free cholesteryl               | mg/dL  | 2                                       | 2   | 0                 | 1                | 7                  | 1    | 2                 | 0                 | 1                | 5                  | 2    | 2                            | 0                 | 1                | 7                  |  |
| 50           | V2FC | VLDL-2 free cholesteryl               | mg/dL  | 2                                       | 1   | 0                 | 1                | 6                  | 1    | 1                 | 0                 | 1                | 4                  | 2    | 1                            | 0                 | 1                | 6                  |  |
| 51           | V3FC | VLDL-3 free cholesteryl               | mg/dL  | 2                                       | 2   | 0                 | 2                | 7                  | 2    | 1                 | 0                 | 2                | 5                  | 2    | 2                            | 1                 | 2                | 7                  |  |
| 52           | V4FC | VLDL-4 free cholesteryl               | mg/dL  | 4                                       | 2   | 0                 | 3                | 9                  | 3    | 2                 | 0                 | 3                | 8                  | 4    | 3                            | 1                 | 3                | 8                  |  |
| 53           | V5FC | VLDL-5 free cholesteryl               | mg/dL  | 1                                       | 1   | 0                 | 0                | 2                  | 1    | 1                 | 0                 | 0                | 2                  | 1    | 1                            | 0                 | 0                | 2                  |  |
| 54           | V1PL | VLDL-1 phospholipids                  | mg/dL  | 6                                       | 5   | 1                 | 4                | 21                 | 5    | 3                 | 0                 | 4                | 12                 | 7    | 5                            | 1                 | 5                | 20                 |  |

| parameter    |           |                        | data of this study cohort (all samples) |    |                   |                  |                    | COVID-19 patients |    |                   |                  |                    | Non-COVID pneumonia controls |    |                   |                  |                    |    |
|--------------|-----------|------------------------|-----------------------------------------|----|-------------------|------------------|--------------------|-------------------|----|-------------------|------------------|--------------------|------------------------------|----|-------------------|------------------|--------------------|----|
| Lipoproteins |           |                        |                                         |    |                   |                  |                    |                   |    |                   |                  |                    |                              |    |                   |                  |                    |    |
| abbreviation | full name | unit                   | mean                                    | sd | Q <sub>2.5%</sub> | Q <sub>50%</sub> | Q <sub>97.5%</sub> | mean              | sd | Q <sub>2.5%</sub> | Q <sub>50%</sub> | Q <sub>97.5%</sub> | mean                         | sd | Q <sub>2.5%</sub> | Q <sub>50%</sub> | Q <sub>97.5%</sub> |    |
| 55           | V2PL      | VLDL-2 phospholipids   | mg/dL                                   | 3  | 2                 | 1                | 2                  | 8                 | 2  | 1                 | 1                | 2                  | 5                            | 3  | 2                 | 1                | 2                  | 8  |
| 56           | V3PL      | VLDL-3 phospholipids   | mg/dL                                   | 4  | 3                 | 0                | 3                  | 10                | 4  | 2                 | 1                | 4                  | 8                            | 4  | 3                 | 1                | 3                  | 10 |
| 57           | V4PL      | VLDL-4 phospholipids   | mg/dL                                   | 7  | 4                 | 1                | 6                  | 14                | 6  | 3                 | 1                | 6                  | 13                           | 7  | 4                 | 3                | 6                  | 14 |
| 58           | V5PL      | VLDL-5 phospholipids   | mg/dL                                   | 2  | 1                 | 0                | 2                  | 4                 | 2  | 1                 | 0                | 2                  | 4                            | 2  | 1                 | 0                | 2                  | 4  |
| 59           | L1TG      | LDL-1 triglycerides    | mg/dL                                   | 11 | 6                 | 3                | 9                  | 29                | 9  | 6                 | 3                | 8                  | 22                           | 12 | 7                 | 3                | 12                 | 26 |
| 60           | L2TG      | LDL-2 triglycerides    | mg/dL                                   | 4  | 2                 | 2                | 4                  | 10                | 4  | 2                 | 2                | 3                  | 8                            | 5  | 2                 | 2                | 4                  | 9  |
| 61           | L3TG      | LDL-3 triglycerides    | mg/dL                                   | 4  | 1                 | 2                | 3                  | 7                 | 3  | 1                 | 2                | 3                  | 6                            | 4  | 1                 | 2                | 4                  | 7  |
| 62           | L4TG      | LDL-4 triglycerides    | mg/dL                                   | 5  | 3                 | 2                | 4                  | 11                | 4  | 2                 | 2                | 4                  | 8                            | 6  | 3                 | 2                | 5                  | 11 |
| 63           | L5TG      | LDL-5 triglycerides    | mg/dL                                   | 5  | 2                 | 1                | 4                  | 9                 | 4  | 2                 | 2                | 4                  | 8                            | 5  | 3                 | 1                | 5                  | 9  |
| 64           | L6TG      | LDL-2 triglycerides    | mg/dL                                   | 5  | 2                 | 1                | 5                  | 10                | 5  | 2                 | 2                | 4                  | 10                           | 6  | 2                 | 2                | 6                  | 10 |
| 65           | L1CH      | LDL-1 cholesterol      | mg/dL                                   | 21 | 12                | 0                | 20                 | 47                | 24 | 13                | 4                | 24                 | 51                           | 19 | 11                | 0                | 18                 | 40 |
| 66           | L2CH      | LDL-2 cholesterol      | mg/dL                                   | 11 | 9                 | 0                | 10                 | 36                | 13 | 11                | 0                | 12                 | 36                           | 10 | 8                 | 0                | 10                 | 28 |
| 67           | L3CH      | LDL-3 cholesterol      | mg/dL                                   | 14 | 9                 | 0                | 14                 | 35                | 17 | 10                | 0                | 16                 | 35                           | 13 | 8                 | 1                | 12                 | 29 |
| 68           | L4CH      | LDL-4 cholesterol      | mg/dL                                   | 12 | 9                 | 0                | 11                 | 34                | 14 | 9                 | 0                | 16                 | 28                           | 11 | 10                | 0                | 8                  | 34 |
| 69           | L5CH      | LDL-5 cholesterol      | mg/dL                                   | 15 | 11                | 0                | 15                 | 43                | 16 | 11                | 0                | 18                 | 35                           | 14 | 11                | 0                | 14                 | 32 |
| 70           | L6CH      | LDL-6 cholesterol      | mg/dL                                   | 21 | 13                | 0                | 19                 | 54                | 22 | 14                | 2                | 20                 | 50                           | 20 | 12                | 1                | 19                 | 43 |
| 71           | L1FC      | LDL-1 free cholesterol | mg/dL                                   | 7  | 3                 | 1                | 7                  | 16                | 8  | 3                 | 3                | 7                  | 16                           | 7  | 3                 | 1                | 6                  | 12 |
| 72           | L2FC      | LDL-2 free cholesterol | mg/dL                                   | 4  | 3                 | 0                | 4                  | 11                | 5  | 3                 | 0                | 4                  | 11                           | 4  | 3                 | 0                | 3                  | 9  |
| 73           | L3FC      | LDL-3 free cholesterol | mg/dL                                   | 5  | 3                 | 1                | 5                  | 11                | 6  | 3                 | 1                | 7                  | 11                           | 5  | 2                 | 2                | 5                  | 9  |
| 74           | L4FC      | LDL-4 free cholesterol | mg/dL                                   | 5  | 3                 | 0                | 5                  | 11                | 5  | 3                 | 1                | 5                  | 10                           | 4  | 3                 | 0                | 4                  | 11 |
| 75           | L5FC      | LDL-5 free cholesterol | mg/dL                                   | 5  | 3                 | 0                | 5                  | 13                | 5  | 3                 | 0                | 6                  | 11                           | 5  | 3                 | 0                | 4                  | 10 |
| 76           | L6FC      | LDL-6 free cholesterol | mg/dL                                   | 6  | 4                 | 0                | 6                  | 16                | 6  | 4                 | 1                | 6                  | 15                           | 6  | 4                 | 0                | 5                  | 13 |
| 77           | L1PL      | LDL-1 phospholipids    | mg/dL                                   | 14 | 7                 | 2                | 13                 | 28                | 15 | 7                 | 4                | 13                 | 30                           | 13 | 6                 | 2                | 12                 | 25 |
| 78           | L2PL      | LDL-2 phospholipids    | mg/dL                                   | 7  | 5                 | 0                | 7                  | 19                | 8  | 5                 | 1                | 8                  | 19                           | 7  | 4                 | 0                | 6                  | 16 |
| 79           | L3PL      | LDL-3 phospholipids    | mg/dL                                   | 9  | 4                 | 2                | 9                  | 19                | 10 | 5                 | 2                | 10                 | 19                           | 8  | 4                 | 2                | 7                  | 17 |
| 80           | L4PL      | LDL-4 phospholipids    | mg/dL                                   | 8  | 5                 | 0                | 7                  | 21                | 9  | 5                 | 0                | 9                  | 17                           | 8  | 5                 | 0                | 6                  | 20 |
| 81           | L5PL      | LDL-5 phospholipids    | mg/dL                                   | 9  | 6                 | 0                | 9                  | 23                | 9  | 6                 | 0                | 10                 | 19                           | 8  | 6                 | 0                | 8                  | 18 |
| 82           | L6PL      | LDL-6 phospholipids    | mg/dL                                   | 12 | 6                 | 0                | 11                 | 29                | 13 | 7                 | 2                | 13                 | 27                           | 12 | 6                 | 2                | 11                 | 23 |
| 83           | L1AB      | LDL-1 Apo-B100         | mg/dL                                   | 15 | 7                 | 5                | 13                 | 28                | 15 | 7                 | 6                | 13                 | 31                           | 14 | 6                 | 5                | 14                 | 26 |
| 84           | L2AB      | LDL-2 Apo-B100         | mg/dL                                   | 8  | 5                 | 0                | 7                  | 19                | 8  | 5                 | 2                | 8                  | 19                           | 7  | 5                 | 0                | 7                  | 16 |
| 85           | L3AB      | LDL-3 Apo-B100         | mg/dL                                   | 11 | 5                 | 4                | 10                 | 20                | 11 | 5                 | 4                | 11                 | 20                           | 10 | 4                 | 4                | 10                 | 19 |
| 86           | L4AB      | LDL-4 Apo-B100         | mg/dL                                   | 10 | 6                 | 0                | 9                  | 25                | 11 | 5                 | 0                | 11                 | 20                           | 10 | 7                 | 0                | 9                  | 25 |
| 87           | L5AB      | LDL-5 Apo-B100         | mg/dL                                   | 13 | 8                 | 0                | 13                 | 31                | 13 | 8                 | 0                | 14                 | 27                           | 12 | 8                 | 0                | 13                 | 29 |
| 88           | L6AB      | LDL-6 Apo-B100         | mg/dL                                   | 18 | 10                | 0                | 16                 | 43                | 19 | 11                | 4                | 18                 | 40                           | 18 | 10                | 3                | 16                 | 38 |
| 89           | H1TG      | HDL-1 triglycerides    | mg/dL                                   | 6  | 3                 | 2                | 5                  | 14                | 6  | 3                 | 2                | 5                  | 12                           | 6  | 3                 | 3                | 5                  | 14 |
| 90           | H2TG      | HDL-2 triglycerides    | mg/dL                                   | 3  | 1                 | 1                | 3                  | 7                 | 3  | 1                 | 1                | 3                  | 5                            | 3  | 1                 | 2                | 3                  | 7  |
| 91           | H3TG      | HDL-3 triglycerides    | mg/dL                                   | 3  | 1                 | 1                | 3                  | 7                 | 3  | 1                 | 1                | 3                  | 5                            | 3  | 1                 | 1                | 3                  | 6  |
| 92           | H4TG      | HDL-4 triglycerides    | mg/dL                                   | 3  | 1                 | 1                | 3                  | 6                 | 3  | 1                 | 1                | 3                  | 4                            | 3  | 1                 | 1                | 3                  | 6  |
| 93           | H1CH      | HDL-1 cholesterol      | mg/dL                                   | 18 | 9                 | 6                | 16                 | 46                | 22 | 10                | 8                | 20                 | 46                           | 15 | 7                 | 6                | 14                 | 32 |
| 94           | H2CH      | HDL-2 cholesterol      | mg/dL                                   | 9  | 3                 | 4                | 8                  | 15                | 10 | 3                 | 5                | 9                  | 15                           | 8  | 2                 | 4                | 7                  | 15 |
| 95           | H3CH      | HDL-3 cholesterol      | mg/dL                                   | 8  | 3                 | 4                | 8                  | 16                | 9  | 3                 | 4                | 10                 | 17                           | 7  | 2                 | 4                | 7                  | 12 |
| 96           | H4CH      | HDL-4 cholesterol      | mg/dL                                   | 10 | 7                 | 0                | 9                  | 24                | 12 | 7                 | 0                | 13                 | 25                           | 9  | 6                 | 0                | 8                  | 21 |
| 97           | H1FC      | HDL-1 free cholesterol | mg/dL                                   | 4  | 3                 | 0                | 4                  | 11                | 6  | 3                 | 0                | 5                  | 11                           | 3  | 2                 | 0                | 3                  | 9  |
| 98           | H2FC      | HDL-2 free cholesterol | mg/dL                                   | 2  | 1                 | 1                | 2                  | 4                 | 3  | 1                 | 1                | 3                  | 4                            | 2  | 1                 | 1                | 2                  | 4  |
| 99           | H3FC      | HDL-3 free cholesterol | mg/dL                                   | 2  | 1                 | 0                | 2                  | 5                 | 2  | 1                 | 0                | 2                  | 5                            | 2  | 1                 | 0                | 1                  | 4  |
| 100          | H4FC      | HDL-4 free cholesterol | mg/dL                                   | 3  | 2                 | 0                | 3                  | 8                 | 3  | 2                 | 0                | 3                  | 8                            | 2  | 2                 | 0                | 2                  | 6  |
| 101          | H1PL      | HDL-1 phospholipids    | mg/dL                                   | 24 | 11                | 8                | 21                 | 59                | 28 | 13                | 12               | 26                 | 60                           | 21 | 8                 | 9                | 18                 | 40 |
| 102          | H2PL      | HDL-2 phospholipids    | mg/dL                                   | 15 | 4                 | 8                | 14                 | 25                | 16 | 5                 | 8                | 15                 | 25                           | 14 | 4                 | 9                | 14                 | 22 |
| 103          | H3PL      | HDL-3 phospholipids    | mg/dL                                   | 13 | 4                 | 7                | 13                 | 25                | 15 | 5                 | 7                | 15                 | 26                           | 12 | 3                 | 8                | 12                 | 19 |
| 104          | H4PL      | HDL-4 phospholipids    | mg/dL                                   | 15 | 8                 | 0                | 14                 | 32                | 17 | 9                 | 3                | 20                 | 34                           | 13 | 7                 | 0                | 14                 | 28 |
| 105          | H1A1      | HDL-1 Apo-A1           | mg/dL                                   | 27 | 17                | 0                | 21                 | 78                | 33 | 21                | 4                | 32                 | 80                           | 22 | 13                | 3                | 18                 | 48 |
| 106          | H2A1      | HDL-2 Apo-A1           | mg/dL                                   | 18 | 6                 | 8                | 16                 | 33                | 19 | 7                 | 9                | 18                 | 34                           | 16 | 5                 | 10               | 15                 | 27 |
| 107          | H3A1      | HDL-3 Apo-A1           | mg/dL                                   | 23 | 7                 | 11               | 22                 | 44                | 25 | 8                 | 13               | 25                 | 44                           | 22 | 6                 | 12               | 21                 | 36 |
| 108          | H4A1      | HDL-4 Apo-A1           | mg/dL                                   | 46 | 20                | 11               | 44                 | 89                | 53 | 22                | 12               | 55                 | 92                           | 42 | 17                | 15               | 40                 | 81 |

| parameter                          |                                                  |             | data of this study cohort (all samples) |      |                   |                  |                    | COVID-19 patients |      |                   |                  |                    | Non-COVID pneumonia controls |      |                   |                  |                    |
|------------------------------------|--------------------------------------------------|-------------|-----------------------------------------|------|-------------------|------------------|--------------------|-------------------|------|-------------------|------------------|--------------------|------------------------------|------|-------------------|------------------|--------------------|
| Lipoproteins                       |                                                  |             |                                         |      |                   |                  |                    |                   |      |                   |                  |                    |                              |      |                   |                  |                    |
| abbreviation                       | full name                                        | unit        | mean                                    | sd   | Q <sub>2.5%</sub> | Q <sub>50%</sub> | Q <sub>97.5%</sub> | mean              | sd   | Q <sub>2.5%</sub> | Q <sub>50%</sub> | Q <sub>97.5%</sub> | mean                         | sd   | Q <sub>2.5%</sub> | Q <sub>50%</sub> | Q <sub>97.5%</sub> |
| 109                                | H1A2 HDL-1 Apo-A2                                | mg/dL       | 3                                       | 2    | 1                 | 3                | 8                  | 4                 | 2    | 1                 | 3                | 9                  | 3                            | 1    | 1                 | 3                | 6                  |
| 110                                | H2A2 HDL-2 Apo-A2                                | mg/dL       | 3                                       | 1    | 2                 | 3                | 6                  | 4                 | 1    | 2                 | 4                | 6                  | 3                            | 1    | 2                 | 3                | 5                  |
| 111                                | H3A2 HDL-3 Apo-A2                                | mg/dL       | 6                                       | 2    | 3                 | 6                | 9                  | 6                 | 2    | 3                 | 6                | 9                  | 6                            | 2    | 3                 | 5                | 9                  |
| 112                                | H4A2 HDL-4 Apo-A2                                | mg/dL       | 11                                      | 6    | 1                 | 11               | 23                 | 13                | 7    | 2                 | 14               | 24                 | 11                           | 5    | 2                 | 10               | 22                 |
| Small Molecular Metabolites        |                                                  |             |                                         |      |                   |                  |                    |                   |      |                   |                  |                    |                              |      |                   |                  |                    |
| 113                                | Ethanol                                          | mmol/L      | 0,17                                    | 0,29 | 0,00              | 0,00             | 0,99               | 0,29              | 0,41 | 0,00              | 0,19             | 1,20               | 0,09                         | 0,13 | 0,00              | 0,00             | 0,40               |
| 114                                | Trimethylamine-N-oxide                           | mmol/L      | 0,00                                    | 0,02 | 0,00              | 0,00             | 0,09               | 0,01              | 0,03 | 0,00              | 0,00             | 0,10               | 0,00                         | 0,01 | 0,00              | 0,00             | 0,00               |
| 115                                | 2-Aminobutyric acid                              | mmol/L      | 0,03                                    | 0,05 | 0,00              | 0,00             | 0,16               | 0,02              | 0,04 | 0,00              | 0,00             | 0,12               | 0,04                         | 0,06 | 0,00              | 0,00             | 0,16               |
| 116                                | Alanine                                          | mmol/L      | 0,44                                    | 0,14 | 0,20              | 0,40             | 0,76               | 0,44              | 0,13 | 0,22              | 0,43             | 0,66               | 0,43                         | 0,15 | 0,21              | 0,39             | 0,75               |
| 117                                | Asparagine                                       | mmol/L      | 0,01                                    | 0,02 | 0,00              | 0,00             | 0,07               | 0,00              | 0,02 | 0,00              | 0,00             | 0,06               | 0,01                         | 0,02 | 0,00              | 0,00             | 0,07               |
| 118                                | Creatine                                         | mmol/L      | 0,06                                    | 0,09 | 0,00              | 0,02             | 0,44               | 0,05              | 0,10 | 0,00              | 0,02             | 0,32               | 0,06                         | 0,08 | 0,00              | 0,03             | 0,21               |
| 119                                | Creatinine                                       | mmol/L      | 0,12                                    | 0,05 | 0,00              | 0,11             | 0,28               | 0,12              | 0,06 | 0,05              | 0,11             | 0,27               | 0,12                         | 0,05 | 0,05              | 0,12             | 0,24               |
| 120                                | Glutamic acid                                    | mmol/L      | 0,23                                    | 0,16 | 0,00              | 0,19             | 0,86               | 0,20              | 0,10 | 0,08              | 0,18             | 0,46               | 0,25                         | 0,19 | 0,09              | 0,19             | 0,82               |
| 121                                | Glutamine                                        | mmol/L      | 0,63                                    | 0,22 | 0,00              | 0,64             | 1,01               | 0,67              | 0,21 | 0,23              | 0,69             | 1,05               | 0,60                         | 0,22 | 0,00              | 0,62             | 0,94               |
| 122                                | Glycine                                          | mmol/L      | 0,39                                    | 0,22 | 0,15              | 0,31             | 1,11               | 0,31              | 0,17 | 0,15              | 0,27             | 0,72               | 0,44                         | 0,24 | 0,19              | 0,36             | 1,06               |
| 123                                | Histidine                                        | mmol/L      | 0,08                                    | 0,02 | 0,04              | 0,08             | 0,14               | 0,08              | 0,02 | 0,04              | 0,08             | 0,13               | 0,08                         | 0,02 | 0,04              | 0,08             | 0,13               |
| 124                                | Isoleucine                                       | mmol/L      | 0,06                                    | 0,03 | 0,00              | 0,06             | 0,12               | 0,06              | 0,02 | 0,02              | 0,05             | 0,10               | 0,07                         | 0,03 | 0,03              | 0,07             | 0,11               |
| 125                                | Leucine                                          | mmol/L      | 0,11                                    | 0,04 | 0,05              | 0,10             | 0,22               | 0,09              | 0,03 | 0,04              | 0,10             | 0,15               | 0,12                         | 0,04 | 0,05              | 0,10             | 0,22               |
| 126                                | Lysine                                           | mmol/L      | 0,15                                    | 0,07 | 0,00              | 0,14             | 0,38               | 0,12              | 0,06 | 0,00              | 0,13             | 0,23               | 0,17                         | 0,07 | 0,06              | 0,16             | 0,38               |
| 127                                | Methionine                                       | mmol/L      | 0,06                                    | 0,03 | 0,00              | 0,07             | 0,11               | 0,05              | 0,04 | 0,00              | 0,06             | 0,10               | 0,07                         | 0,03 | 0,00              | 0,07             | 0,11               |
| 128                                | N,N-Dimethylglycine                              | mmol/L      | 0,00                                    | 0,00 | 0,00              | 0,00             | 0,01               | 0,00              | 0,01 | 0,00              | 0,00             | 0,01               | 0,00                         | 0,00 | 0,00              | 0,00             | 0,01               |
| 129                                | Ornithine                                        | mmol/L      | 0,03                                    | 0,05 | 0,00              | 0,00             | 0,16               | 0,02              | 0,04 | 0,00              | 0,00             | 0,14               | 0,03                         | 0,05 | 0,00              | 0,00             | 0,15               |
| 130                                | Phenylalanine                                    | mmol/L      | 0,12                                    | 0,05 | 0,05              | 0,11             | 0,22               | 0,10              | 0,03 | 0,05              | 0,11             | 0,14               | 0,14                         | 0,05 | 0,06              | 0,14             | 0,22               |
| 131                                | Proline                                          | mmol/L      | 0,36                                    | 0,32 | 0,00              | 0,45             | 1,10               | 0,35              | 0,32 | 0,00              | 0,44             | 0,78               | 0,37                         | 0,33 | 0,00              | 0,46             | 1,07               |
| 132                                | Sarcosine                                        | mmol/L      | 0,00                                    | 0,00 | 0,00              | 0,00             | 0,00               | 0,00              | 0,00 | 0,00              | 0,00             | 0,00               | 0,00                         | 0,00 | 0,00              | 0,00             | 0,00               |
| 133                                | Threonine                                        | mmol/L      | 0,03                                    | 0,07 | 0,00              | 0,00             | 0,26               | 0,04              | 0,10 | 0,00              | 0,00             | 0,29               | 0,02                         | 0,04 | 0,00              | 0,00             | 0,13               |
| 134                                | Tyrosine                                         | mmol/L      | 0,06                                    | 0,02 | 0,00              | 0,06             | 0,10               | 0,05              | 0,02 | 0,03              | 0,05             | 0,08               | 0,06                         | 0,02 | 0,00              | 0,06             | 0,10               |
| 135                                | Valine                                           | mmol/L      | 0,24                                    | 0,07 | 0,13              | 0,23             | 0,41               | 0,22              | 0,06 | 0,13              | 0,21             | 0,32               | 0,25                         | 0,08 | 0,14              | 0,23             | 0,41               |
| 136                                | 2-Hydroxybutyric acid                            | mmol/L      | 0,07                                    | 0,11 | 0,00              | 0,00             | 0,35               | 0,06              | 0,12 | 0,00              | 0,00             | 0,37               | 0,07                         | 0,11 | 0,00              | 0,00             | 0,30               |
| 137                                | Acetic acid                                      | mmol/L      | 0,04                                    | 0,02 | 0,01              | 0,03             | 0,14               | 0,03              | 0,03 | 0,01              | 0,03             | 0,09               | 0,04                         | 0,02 | 0,01              | 0,03             | 0,10               |
| 138                                | Citric acid                                      | mmol/L      | 0,09                                    | 0,06 | 0,00              | 0,08             | 0,24               | 0,09              | 0,07 | 0,00              | 0,07             | 0,23               | 0,09                         | 0,07 | 0,00              | 0,08             | 0,23               |
| 139                                | Formic acid                                      | mmol/L      | 0,06                                    | 0,02 | 0,03              | 0,06             | 0,12               | 0,06              | 0,02 | 0,04              | 0,06             | 0,10               | 0,06                         | 0,02 | 0,03              | 0,06             | 0,11               |
| 140                                | Lactic acid                                      | mmol/L      | 2,33                                    | 1,61 | 0,66              | 1,90             | 8,12               | 2,46              | 1,83 | 0,73              | 1,90             | 7,65               | 2,25                         | 1,47 | 0,85              | 2,00             | 5,65               |
| 141                                | Succinic acid                                    | mmol/L      | 0,01                                    | 0,03 | 0,00              | 0,00             | 0,10               | 0,01              | 0,02 | 0,00              | 0,00             | 0,05               | 0,02                         | 0,03 | 0,00              | 0,00             | 0,10               |
| 142                                | Choline                                          | mmol/L      | 0,00                                    | 0,01 | 0,00              | 0,00             | 0,05               | 0,00              | 0,02 | 0,00              | 0,00             | 0,05               | 0,00                         | 0,01 | 0,00              | 0,00             | 0,05               |
| 143                                | 2-Oxoglutaric acid                               | mmol/L      | 0,00                                    | 0,01 | 0,00              | 0,00             | 0,04               | 0,00              | 0,01 | 0,00              | 0,00             | 0,02               | 0,01                         | 0,01 | 0,00              | 0,00             | 0,04               |
| 144                                | 3-Hydroxybutyric acid                            | mmol/L      | 0,41                                    | 0,60 | 0,00              | 0,14             | 2,31               | 0,31              | 0,47 | 0,02              | 0,13             | 1,35               | 0,47                         | 0,67 | 0,00              | 0,15             | 2,29               |
| 145                                | Acetoacetic acid                                 | mmol/L      | 0,05                                    | 0,10 | 0,00              | 0,00             | 0,44               | 0,01              | 0,02 | 0,00              | 0,00             | 0,06               | 0,07                         | 0,12 | 0,00              | 0,00             | 0,42               |
| 146                                | Acetone                                          | mmol/L      | 0,06                                    | 0,09 | 0,00              | 0,03             | 0,41               | 0,05              | 0,06 | 0,00              | 0,03             | 0,19               | 0,07                         | 0,10 | 0,00              | 0,03             | 0,40               |
| 147                                | Pyruvic acid                                     | mmol/L      | 0,10                                    | 0,06 | 0,03              | 0,09             | 0,26               | 0,11              | 0,06 | 0,04              | 0,09             | 0,24               | 0,10                         | 0,06 | 0,03              | 0,09             | 0,25               |
| 148                                | D-Galactose                                      | mmol/L      | 0,00                                    | 0,00 | 0,00              | 0,00             | 0,00               | 0,00              | 0,00 | 0,00              | 0,00             | 0,00               | 0,00                         | 0,00 | 0,00              | 0,00             | 0,00               |
| 149                                | Glucose                                          | mmol/L      | 7,85                                    | 3,40 | 3,79              | 6,95             | 17,05              | 7,75              | 3,37 | 4,10              | 6,90             | 15,50              | 7,91                         | 3,46 | 4,00              | 7,00             | 17,00              |
| 150                                | Glycerol                                         | mmol/L      | 0,47                                    | 0,34 | 0,00              | 0,38             | 1,61               | 0,44              | 0,32 | 0,00              | 0,36             | 1,23               | 0,49                         | 0,36 | 0,00              | 0,45             | 1,20               |
| 151                                | Dimethylsulfone                                  | mmol/L      | 0,01                                    | 0,01 | 0,00              | 0,00             | 0,05               | 0,01              | 0,02 | 0,00              | 0,00             | 0,06               | 0,00                         | 0,01 | 0,00              | 0,00             | 0,02               |
| 152                                | Ca-EDTA Calcium Ethylenediaminetetraacetic acid  | mmol/L      | 0,03                                    | 0,23 | 0,00              | 0,00             | 0,05               | 0,06              | 0,36 | 0,00              | 0,00             | 0,50               | 0,00                         | 0,00 | 0,00              | 0,00             | 0,00               |
| 153                                | K-EDTA Potassium Ethylenediaminetetraacetic acid | mmol/L      | 0,11                                    | 0,95 | 0,00              | 0,00             | 0,21               | 0,27              | 1,51 | 0,00              | 0,00             | 2,10               | 0,00                         | 0,00 | 0,00              | 0,00             | 0,00               |
| Inflammatory Markers (PACS pannel) |                                                  |             |                                         |      |                   |                  |                    |                   |      |                   |                  |                    |                              |      |                   |                  |                    |
| 154                                | GlycA GlycA signal                               | p.d.u       | 1,13                                    | 0,24 | 0,76              | 1,09             | 1,69               | 1,08              | 0,26 | 0,77              | 1,07             | 1,60               | 1,16                         | 0,22 | 0,77              | 1,18             | 1,52               |
| 155                                | GlycB GlycB signal                               | p.d.u       | 0,45                                    | 0,09 | 0,31              | 0,45             | 0,64               | 0,43              | 0,10 | 0,31              | 0,43             | 0,64               | 0,46                         | 0,08 | 0,31              | 0,47             | 0,60               |
| 156                                | Glyc Glycoprotein composite signal               | p.d.u       | 1,57                                    | 0,33 | 1,07              | 1,53             | 2,33               | 1,51              | 0,36 | 1,08              | 1,51             | 2,21               | 1,62                         | 0,30 | 1,08              | 1,65             | 2,09               |
| 157                                | SPC Supramolecular phospholipid composite        | p.d.u       | 1,68                                    | 0,67 | 0,74              | 1,53             | 3,49               | 1,99              | 0,74 | 0,85              | 1,85             | 3,62               | 1,48                         | 0,53 | 0,85              | 1,40             | 2,96               |
| 158                                | Glyc/SPC Glyc/SPC ratio                          | p.d.u/p.d.u | 1,11                                    | 0,56 | 0,38              | 0,97             | 2,40               | 0,91              | 0,55 | 0,38              | 0,77             | 2,46               | 1,25                         | 0,53 | 0,39              | 1,25             | 2,34               |

p.d.u |procedure defined units
